# Supplementary material for: Novel and Annotated Long Noncoding RNAs Associated with Ischemia in the Human Heart
Source: MDPI journal article supplement (doi:10.3390/ijms222111324), 2021-10-20
Supplement: s1 [file s1]

# Supplementary Materials

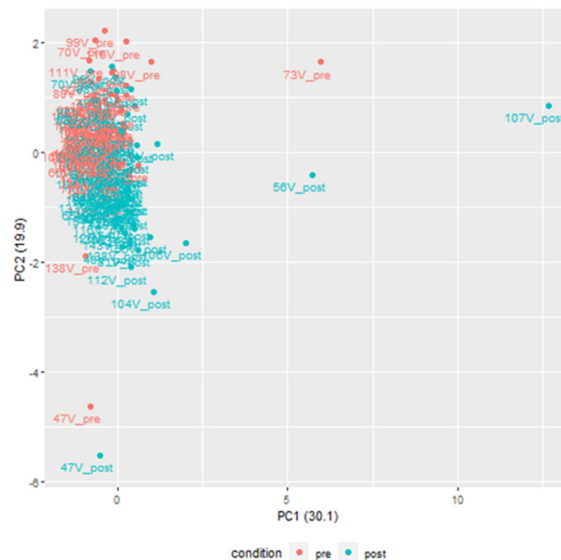

**Supplementary Figure S1:** Principal Component Analysis (PCA) on the transcriptome of the samples. Red indicates pre-ischemic samples; blue indicates post-ischemic samples.

**Supplementary Figure S2.** MultiQC plot showing the aberrant fragment length distribution generated during library preparation of sample ID 47 pre- and post-ischemia. This sample and the samples from Supplementary Figure 3 were dropped from the analysis.

## Salmon

Salmon is a tool for quantifying the expression of transcripts using RNA-seq data.

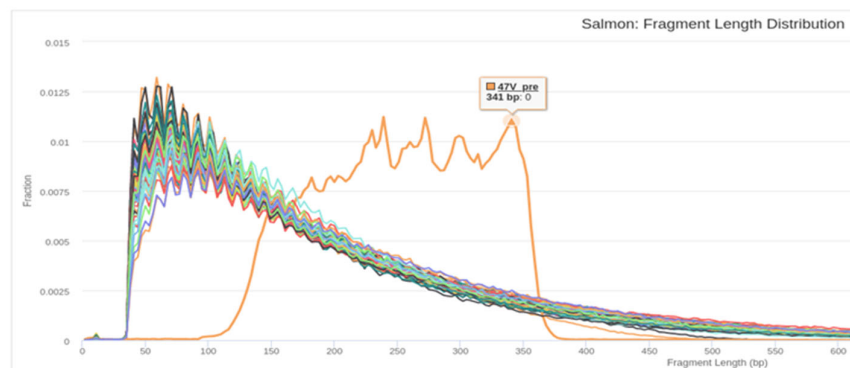

## Salmon

Salmon is a tool for quantifying the expression of transcripts using RNA-seq data.

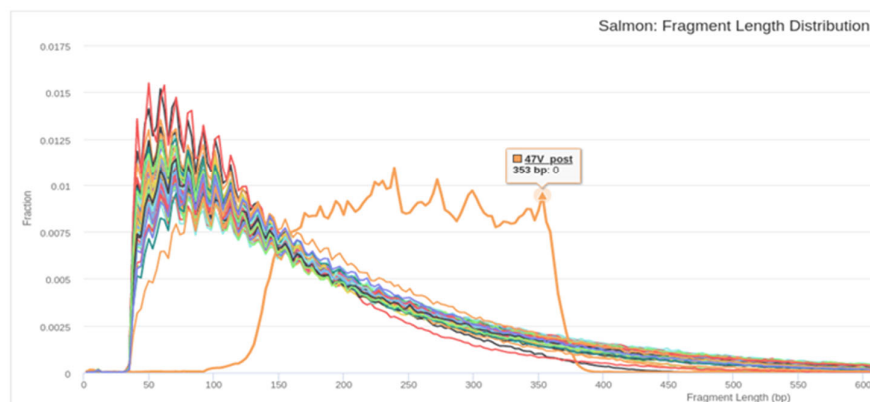

**Supplementary Figure S3.** R package TissueEnrich plots showing the expression of tissue expression genes. Normal plots (56V\_pre, 73V\_post and 107\_pre) show the highest gene expression from heart muscle followed by a lower expression from skeletal muscle. Samples 56V\_post, 73V\_pre and 107V\_post show aberrant gene expression with very low gene expression from heart tissue with expression from other tissue. Note the y-axes are different for the aberrant samples.

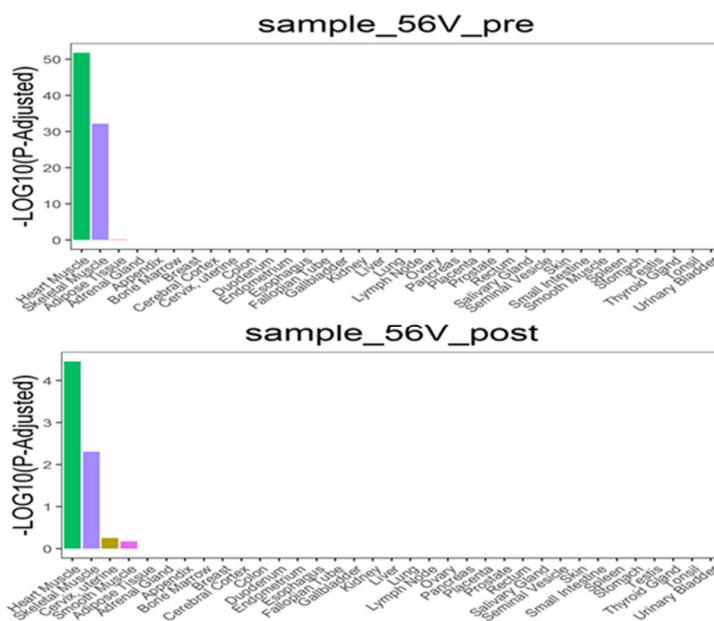

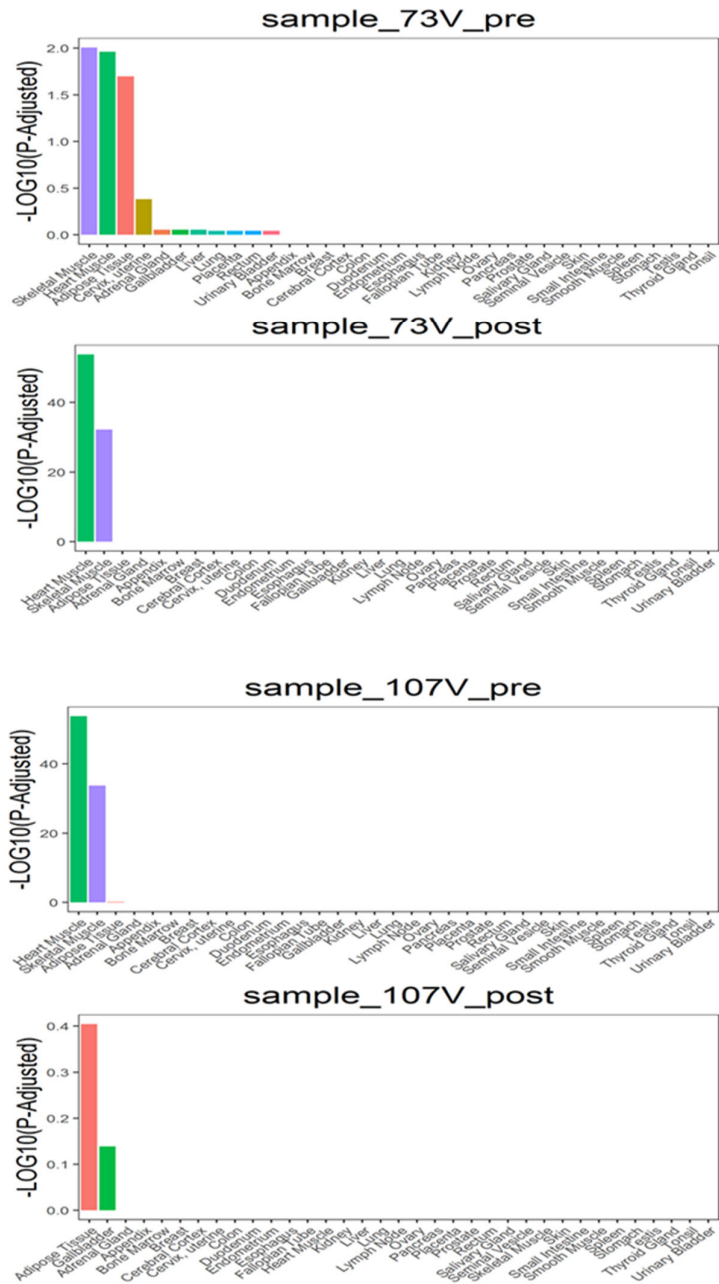

**Supplementary Figure S4.** Screen shots from Ensembl Genome Browser showing overlap of regulatory sites. A–D) The novel lncRNA identified in this study and the three putative hub lncRNAs from module 1; E–F) the two putative hub lncRNAs from module 2.

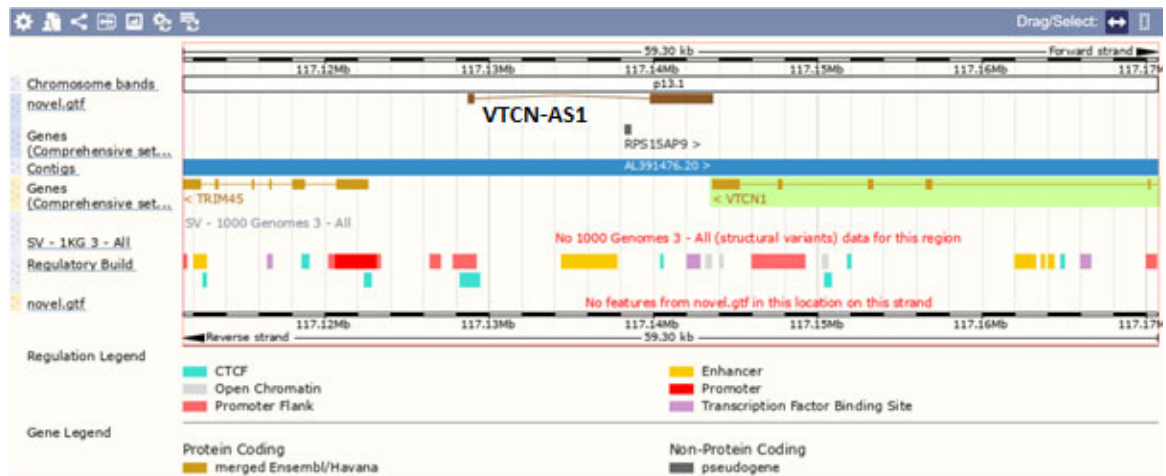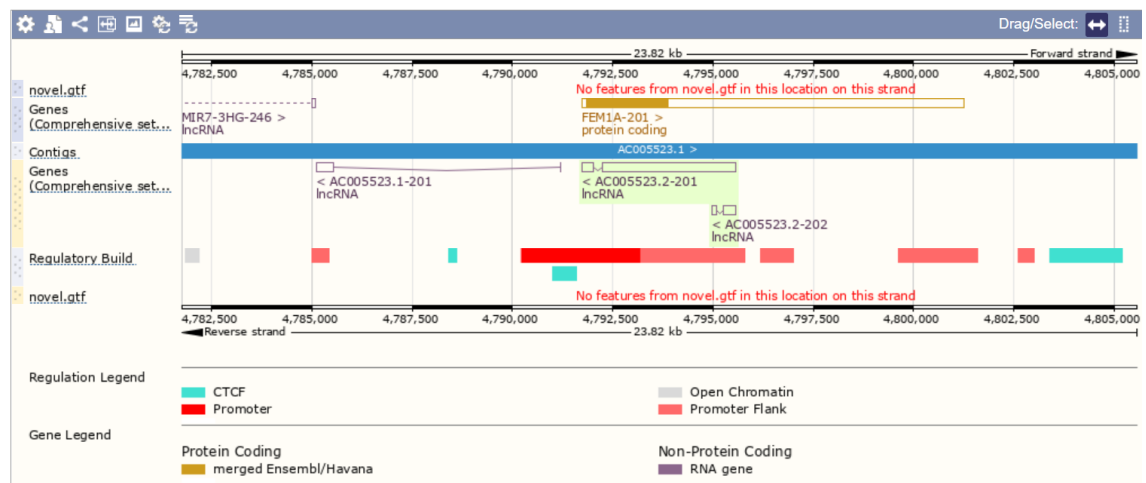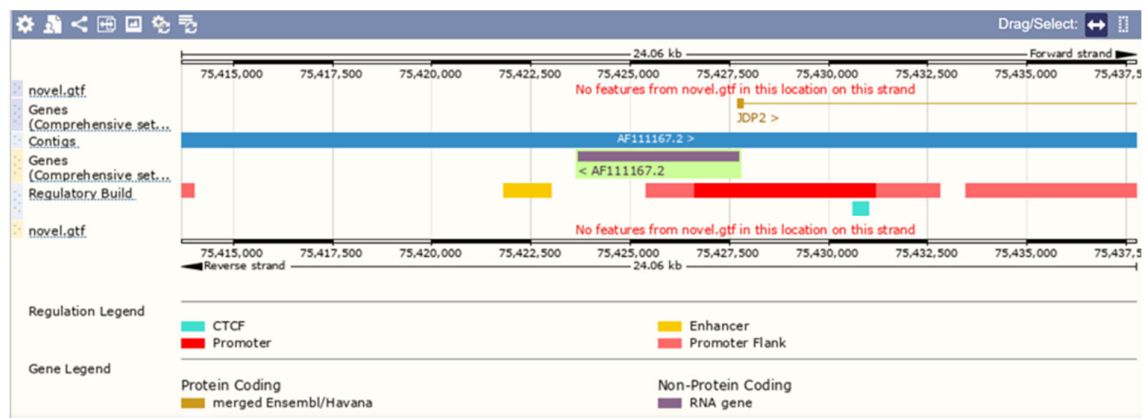

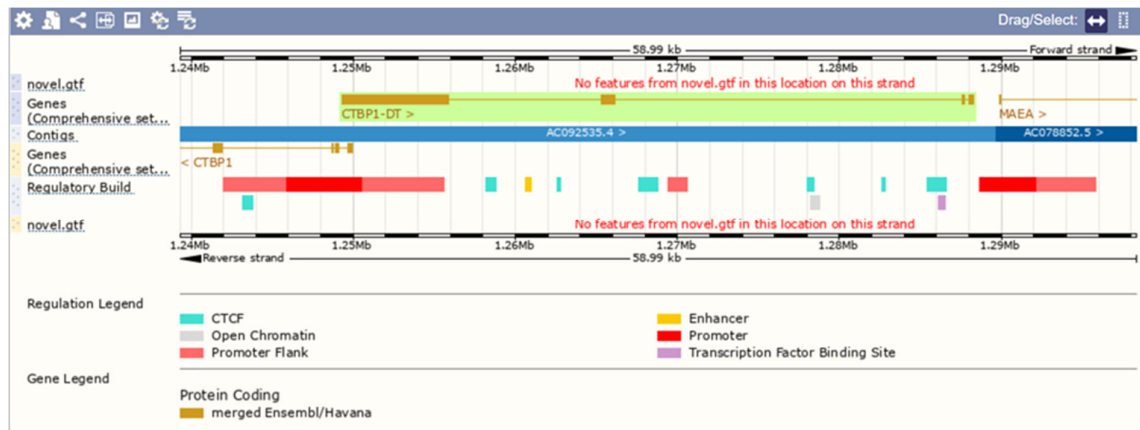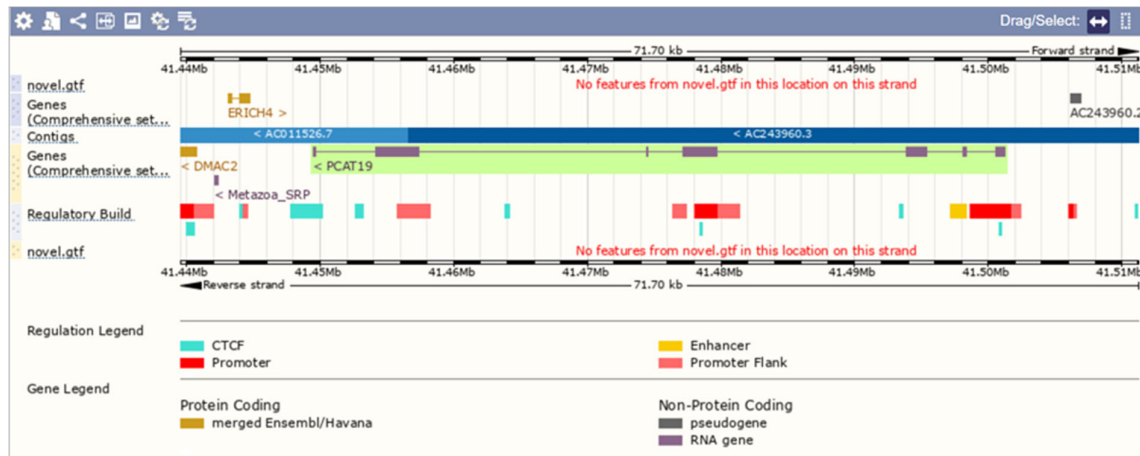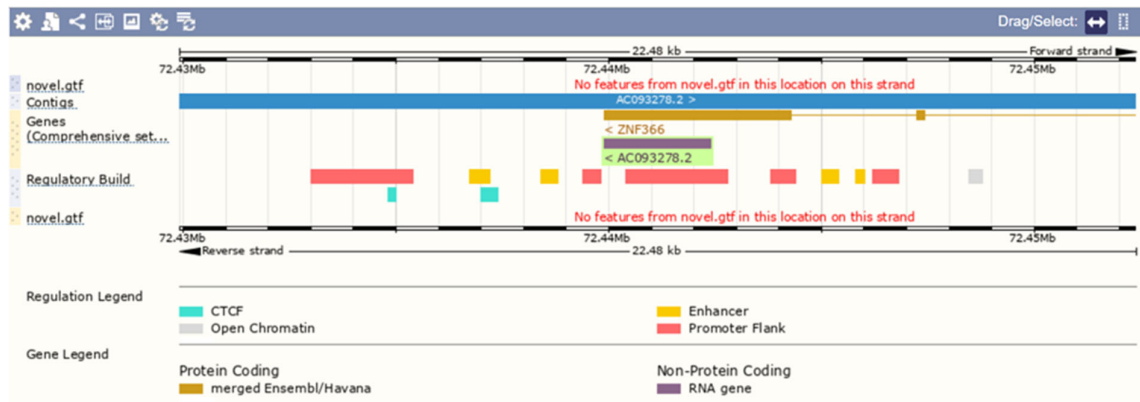

**Supplementary Figure S5.** Sequin controls. We carried out isoform-level quantification on the internal sequin controls using Salmon to assess the limit of detection. We found a strong correlation between measured abundance (transcripts per million TPM) and input concentration ( $R^2 = 0.82$ , slope = 1.25) and a limit of detection of 0.0194 attomoles/ $\mu$ L.

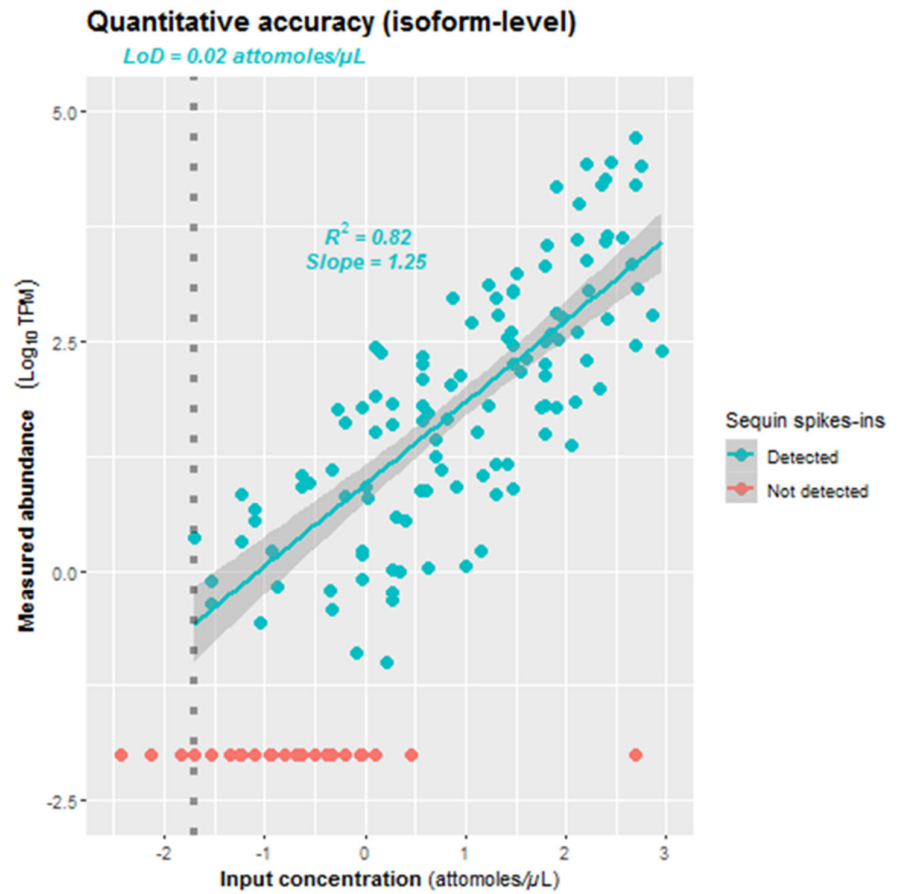

**Supplementary Figure S6.** Module-trait relationships predicted by Weighted Gene-Correlated Network Analysis (WGCNA). Each cell shows the correlation and p-value between the module eigengene (row) and the trait (column). The table is color-coded by correlation according to the color legend.

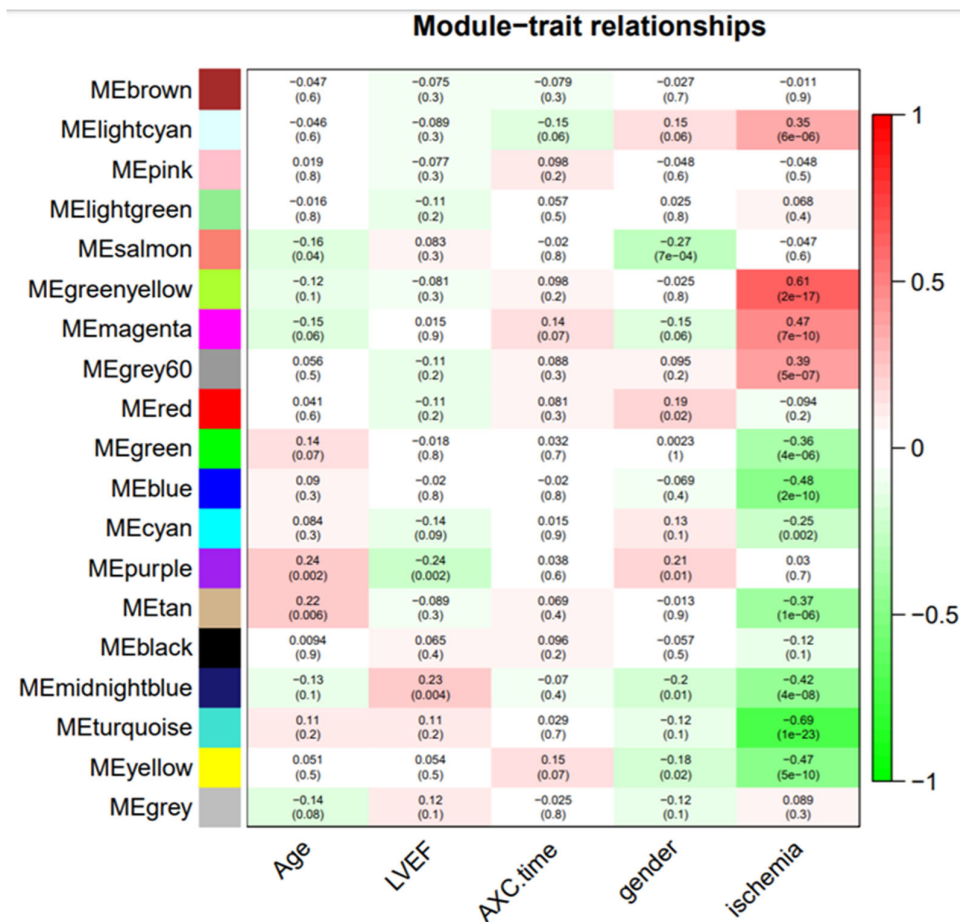

**Supplementary Figure S7.** Pearson correlation of lncRNA-mRNA pairs AC005523.2- FEM1A (left) and AC011476.3—RDH13 (right) where the lncRNA also overlapped cis-eQTLs associated with the mRNA.

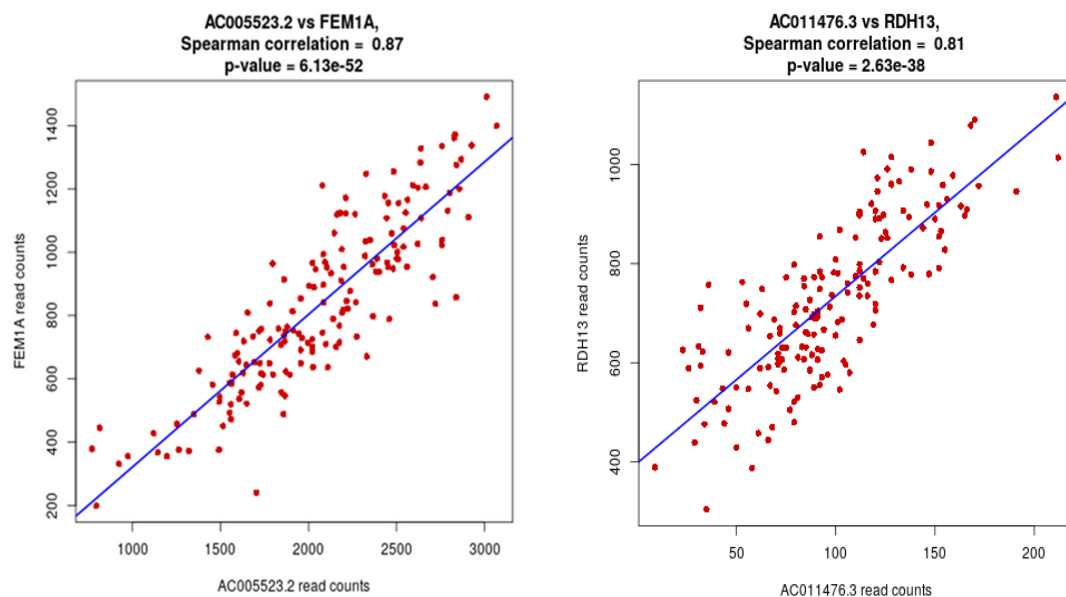

**Supplementary Figure S8.** Pearson correlation of novel lncRNA-mRNA pair RWDD3-DT–RWDD3. RWDD3-DT overlapped cis-eQTLs associated with RWD Domain-Containing Sumoylation Enhancer (RWDD).

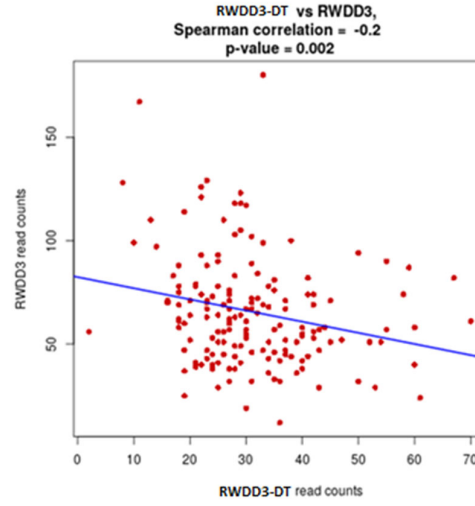

**Supplementary Table S1** The exon co-ordinates for the 10 novel lncRNAs identified by the pipeline.

| Putative Name | Feature    | Chromosome | Start     | Stop      | Strand |
|---------------|------------|------------|-----------|-----------|--------|
| VTCN1-AS      | transcript | chr1       | 117128696 | 117143589 | +      |
|               | exon       | chr1       | 117128696 | 117129041 | +      |
|               | exon       | chr1       | 117139815 | 117143589 | +      |
| LINC02934     | transcript | chr2       | 37489457  | 37605898  | +      |
|               | exon       | chr2       | 37489457  | 37489581  | +      |
|               | exon       | chr2       | 37536995  | 37537151  | +      |
|               | exon       | chr2       | 37605236  | 37605898  | +      |
| LINC02935     | transcript | chr3       | 15894181  | 16137554  | +      |
|               | exon       | chr3       | 15894181  | 15894285  | +      |
|               | exon       | chr3       | 15946784  | 15946855  | +      |
|               | exon       | chr3       | 15947135  | 15947192  | +      |
|               | exon       | chr3       | 16137391  | 16137554  | +      |
| ADCY5-AS      | transcript | chr3       | 123335278 | 123338361 | +      |
|               | exon       | chr3       | 123335278 | 123335579 | +      |
|               | exon       | chr3       | 123336338 | 123336400 | +      |
|               | exon       | chr3       | 123337544 | 123338361 | +      |
| LINC02936     | transcript | chr5       | 107778856 | 107781422 | +      |
|               | exon       | chr5       | 107778856 | 107779025 | +      |
|               | exon       | chr5       | 107780752 | 107781422 | +      |
| LINC02937     | transcript | chr6       | 157328269 | 157363141 | +      |
|               | exon       | chr6       | 157328269 | 157328448 | +      |
|               | exon       | chr6       | 157332280 | 157332451 | +      |
|               | exon       | chr6       | 157361737 | 157361784 | +      |
|               | exon       | chr6       | 157363066 | 157363141 | +      |
| LINC02938     | transcript | chr8       | 94223489  | 94228144  | -      |
|               | exon       | chr8       | 94223489  | 94225595  | -      |
|               | exon       | chr8       | 94226722  | 94226806  | -      |
|               | exon       | chr8       | 94228039  | 94228144  | -      |
| PDGFD-AS      | transcript | chr11      | 104071819 | 104093201 | +      |
|               | exon       | chr11      | 104071819 | 104072232 | +      |
|               | exon       | chr11      | 104084012 | 104084205 | +      |



|          |            |       |           |           |   |
|----------|------------|-------|-----------|-----------|---|
|          | exon       | chr11 | 104085349 | 104085425 | + |
|          | exon       | chr11 | 104092371 | 104093201 | + |
| DHRS1-AS | transcript | chr14 | 24271210  | 24299055  | + |
|          | exon       | chr14 | 24271210  | 24271310  | + |
|          | exon       | chr14 | 24298614  | 24298873  | + |
|          | exon       | chr14 | 24299027  | 24299055  | + |
| RWDD3-DT | transcript | chr1  | 95247358  | 95256066  | + |
|          | exon       | chr1  | 95247358  | 95247934  | + |
|          | exon       | chr1  | 95252486  | 95256066  | + |

**Supplementary Table S2.** The top five disease or functions predicted by Ingenuity Pathway Analysis (IPA) (sorted by z-score) associated with the two modules most associated with ischemia (WGCNA).

| Categories                                     | Module | Diseases or Functions Annotation        | p-value           | Predicted Activation State | Activation z-Score |
|------------------------------------------------|--------|-----------------------------------------|-------------------|----------------------------|--------------------|
| Cell Death and Survival                        | 1      | Necrosis                                | $6.47 * 10^{-9}$  | Increased                  | 3.4                |
| Organismal Survival                            | 1      | Morbidity or mortality                  | $9.2 * 10^{-8}$   | Increased                  | 12.7               |
| Cell Death and Survival                        | 1      | Apoptosis                               | $9.03 * 10^{-8}$  | Increased                  | 4.1                |
| Organismal Survival                            | 1      | Organismal death                        | $5.58 * 10^{-8}$  | Increased                  | 12.7               |
| Organismal Injury and Abnormalities            | 1      | Organ Degeneration                      | $4.3 * 10^{-6}$   | Increased                  | 4.3                |
| Cardiovascular System Development and Function | 2      | Angiogenesis                            | $6.31 * 10^{-13}$ | Increased                  | 4.4                |
| Cardiovascular System Development and Function | 2      | Development of vasculature              | $1.02 * 10^{-13}$ | Increased                  | 4.4                |
| Cardiovascular System Development and Function | 2      | Vasculogenesis                          | $1.23 * 10^{-12}$ | Increased                  | 4.3                |
| Hematological System Development and Function  | 2      | Hematopoiesis of mononuclear leukocytes | $9.75 * 10^{-7}$  | Increased                  | 3.4                |
| Hematological System Development and Function  | 2      | Quantity of lymphocytes                 | $1.42 * 10^{-6}$  | Increased                  | 3.7                |
